# Supplementary material for: COVID-19 triggered a physically active lifestyle of people with cardiovascular diseases: Results of a small Austrian qualitative study
Source: Frontiers journal article supplement (doi:10.3389/fpubh.2022.947250), 2022-08-12
Supplement: Table_2.pdf [file Table_2.pdf]

**Supplementary Table 2:** Codes, sub-codes, descriptions, and sample quotes on the impact of the pandemic on physical activity patterns.

| Code and Sub-codes                      | Description                                                                                                | Sample quote                                                                                                                                                               |
|-----------------------------------------|------------------------------------------------------------------------------------------------------------|----------------------------------------------------------------------------------------------------------------------------------------------------------------------------|
| <b>Motivation for physical activity</b> | <b>Explanations of motivational drivers for engaging in physical activity.</b>                             |                                                                                                                                                                            |
| Intrinsic Motivation                    | Expressing feelings of pleasure, enjoyment and satisfaction when talking about physical activity patterns. | “I have to say that I have moved more, quite simply. And that I simply enjoy it, yes. Or the gymnastics in the evening and so on. I look forward to that.” [EL11: 233-233] |
| Integrated Regulation                   | Emphasizing being a physically active person, claiming to be an “Exerciser”.                               | “And a little bit (...), you can't. Either you do it right or not at all.” [EL6: 115-115]                                                                                  |
| Identified Regulation                   | Engaging in physical activity because it is important to attain a desired outcome (health or others).      | “... still try to do exercise so that the heart muscle is further strengthened.” [HB1: 2-2]                                                                                |
| Introjected Regulation                  | Engaging in physical activity to avoid feeling guilty or shamed or to receive acknowledgement.             | “Because I don't put myself under any more stress by training”. [EL2:117-117]                                                                                              |
| External regulation                     | Engaging in physical activity due to an advice of a physician, therapist, family member, friend, etc.      | “First of all, they recommended it to me.” [JC2: 54]                                                                                                                       |
| Amotivation                             | Expressions indicating that physical activity is not very important to the participant.                    | “... so I hardly, if you compare it with normal movement patterns, hardly went out and hiked or any other movements.” [HB3: 48-48]                                         |

| Physical activity patterns                                      | Descriptions of physical activity patterns and preferences of study participants before Covid-times.                                                                                           |                                                                                                                                 |
|-----------------------------------------------------------------|------------------------------------------------------------------------------------------------------------------------------------------------------------------------------------------------|---------------------------------------------------------------------------------------------------------------------------------|
| Moderate outdoor exercise                                       | Moderate forms of outdoor exercise: powerwalking, hiking, biking, golf, archery, skiing                                                                                                        | “We go hiking a lot ... in summer, we go biking. [EL6: 109-109]                                                                 |
| Moderate to vigorous indoor exercise                            | Moderate to vigorous forms of exercise using indoor sporting facilities: group fitness, exercising in a fitness club, swimming, team sport, aerobics                                           | ... before Corona, when I think, I went swimming regularly, I went to the fitness center regularly.” [JC3: 58-58]               |
| Moderate to vigorous exercising at home                         | Moderate to vigorous forms of exercising at home: gymnastics at home, TV-led exercise programs, Cardio-training at home.                                                                       | “I did all that myself, I put together all the exercises myself. And I also trained before. I did that before ...” [HB2: 50-50] |
| Leisure behavior                                                | Walking and other leisure behavior that includes walking (going shopping, housekeeping, gardening)                                                                                             | “... most important thing is the garden. Because ..., I do the whole garden and there is so much movement.” [EL1: 47-47]        |
| Impact of the pandemic on physical activity patterns            | Descriptions of weather and how the restrictions imposed during lockdowns affected physical activity patterns.                                                                                 |                                                                                                                                 |
| Continuation of moderate physical activity with no restrictions | Perceiving no restrictions in physical activity during lockdowns because of being used to do activities that were not affected by the measures: moderate outdoor exercise, exercising at home. | “Yes, I don't go to fitness studios anyway. I ... move, outdoors, in nature.” [PJ4: 37-37]                                      |

|                                                               |                                                                                                                                                                                                                    |                                                                                                                                                                                                                                                     |
|---------------------------------------------------------------|--------------------------------------------------------------------------------------------------------------------------------------------------------------------------------------------------------------------|-----------------------------------------------------------------------------------------------------------------------------------------------------------------------------------------------------------------------------------------------------|
| Cessation/reduction of moderate to vigorous physical exercise | Perceiving restrictions in moderate to vigorous physical exercise because sporting facilities were closed.                                                                                                         | “... they did not open in between ... they have renovated the swimming pool and ... [I] do not know whether they open it or not .... unfortunately.” [JC3: 60-60]                                                                                   |
| Continuation of leisure behavior with no/minor restrictions   | Perceiving minor/no restrictions in walking and other leisure behavior that includes walking because these activities were hardly/not affected by the lockdown measures (going shopping, housekeeping, gardening). | “Walk with the dog, was possible before and after. So, there were no differences at all.” [KS1: 48-48]                                                                                                                                              |
| Cessation/reduction/modification of leisure behavior          | Perceiving restrictions in walking and other leisure behavior that includes walking due to lockdown measures (going shopping, going out, housekeeping, gardening).                                                 | “... and I've always been outside every day, whether after work somewhere or now on the weekend, but in the first lockdown, well that was just stricter, I say ..., you just ordered food or whatever, yes. But otherwise not really.” [KS2: 84-84] |
| <b>Strategies to maintain physical activity</b>               | <b>Strategies taken by participants to maintain physical activity during and after lockdowns</b>                                                                                                                   |                                                                                                                                                                                                                                                     |
| Integration of walking into daily routine                     | Indications of participants that daily walking tours has become a routine for them.                                                                                                                                | And I walked five or six kilometers every day, in one or one and a half hours. And that's actually how it all started.” [EL11: 3-3]                                                                                                                 |
| Integration of moderate exercising at home into daily routine | Indications of participants that daily walking tours has become a routine for them.                                                                                                                                | “I regularly got on my exercise bike ... and cycled for about half an hour with interruptions.” [HB1: 28-28]                                                                                                                                        |

|                                                                |                                                                                                                                                                                            |                                                                                                                                                                    |
|----------------------------------------------------------------|--------------------------------------------------------------------------------------------------------------------------------------------------------------------------------------------|--------------------------------------------------------------------------------------------------------------------------------------------------------------------|
| Increase in outdoor leisure activities                         | Indications of participants that they increased frequency and duration of walks or were doing more gardening.                                                                              | “And just go for a walk a lot. That's my ... we've really been walking, since Corona is now, now the 2nd lockdown, three, four kilometers every day.” [EL1: 46-46] |
| Increase in moderate outdoor exercise                          | Indications of participants that they increased frequency and duration of moderate outdoor exercise (walking, hiking, biking).                                                             | “But, as I said first, we also cycled a lot. And there was always something. We hiked there, hiked there ...” [EL3: 104-104]                                       |
| Introduction/increase of moderate to vigorous outdoor exercise | Indications of participants that they increased or entered into moderate to vigorous outdoor exercises.                                                                                    | “My sport now is chopping wood. The meter pieces are really heavy anyway.” [EL2: 34-34]                                                                            |
| Replacement indoor exercise by moderate outdoor exercise       | Indications of participants that they replaced moderate to vigorous indoor exercise by moderate outdoor exercise (walking, hiking, biking)                                                 | “... as we have already discussed, the omission of the indoor activities, we have then compensated in part with hikes.” [KS4: 120-120]                             |
| Replacement indoor exercise by moderate to vigorous exercise   | Indications of participants that they replaced moderate to vigorous indoor exercise by moderate to vigorous outdoor exercise (work with a personal trainer outdoors, swimming in the lake) | “As then in summer, I just went swimming then ... let's say we swam a lot or went swimming more ... in [the] lake, yes. [JC3: 62-64]                               |
| Resuming physical exercise due to release of measures          | Experiences by participants when resuming indoor exercising after measures have been released.                                                                                             | “Yes, we were lucky that the golf course was only closed for a few weeks. It was ... usable under certain conditions during the first lockdown.” [KS4: 96-96]      |

---

| Influencing factors                                     | External factors influencing physical activity patterns mentioned by participants                                                                        |                                                                                                                                                                                                                                    |
|---------------------------------------------------------|----------------------------------------------------------------------------------------------------------------------------------------------------------|------------------------------------------------------------------------------------------------------------------------------------------------------------------------------------------------------------------------------------|
| Physical Impairment                                     | Indications by study participants that they felt limited in their physical activity due to the burden of disease or other injuries or co-morbidities.    | “I go out less since I had the elbow fall. Doesn't really have anything to do with Corona, but I have the fear in my head of falling. As a result, I go out less on my own.” [JC1: 68-68]                                          |
| Time of the year                                        | Indications by study participants that daylight, weather, or temperatures influenced their physical activity patterns.                                   | “But you just had the ... spring, had the advantage, they went to the parks, they went for a walk. But now almost no one goes out. What do you want to do? Everything is gloomy. And the weather, if you look at it.” [EL2: 13-13] |
| Availability of time                                    | Indications by study participants that availability of time influenced their physical activity patterns.                                                 | “In any case, that has intensified, because now that I'm in home office, it's easier for me to find time. Now from the sports point of view.” [EL9: 47-47]                                                                         |
| Partner, friends                                        | Indications by study participants that their partner or friends influenced their physical activity patterns.                                             | “My wife anyway, she is constantly on the move. She must do that because of her spine. And I move around, too.” [EL6: 109-109]                                                                                                     |
| Availability of garden/proximity to green natural areas | Indications by study participants that the availability of a garden or the proximity to green natural areas influenced their physical activity patterns. | “... and besides I still have my garden in Lower Austria which also occupies me and distracts me and there actually everything does not matter.” [KS4: 44-44]                                                                      |
